# Supplementary material for: Crop, Host, and Gut Microbiome Variation Influence Precision Nutrition: An Example of Blueberries
Source: MDPI journal article supplement (doi:10.3390/antiox12051136), 2023-05-22
Supplement: s1 [file s1]

Supplementary Table S1. Pharmacokinetic Parameters for Anthocyanin Metabolites

| Metabolite | Blueberry Genotype | AUC ( $\mu\text{M}\cdot\text{h}$ ) | Cmax (nM)        | Tmax (h)        | Normalized by dose                           |                        |
|------------|--------------------|------------------------------------|------------------|-----------------|----------------------------------------------|------------------------|
|            |                    |                                    |                  |                 | AUC ( $\mu\text{M}\cdot\text{h}/\text{mg}$ ) | Cmax (nM/mg)           |
| Cy-3-Glc   | Ira                | $0.02 \pm 0$                       | $8.38 \pm 1.53$  | $0.33 \pm 0.08$ | $0.022 \pm 0.005^c$                          | $7.85 \pm 1.43^c$      |
|            | Montgomery         | $0.05 \pm 0.01$                    | $9.4 \pm 1.12$   | $0.42 \pm 0.08$ | $0.125 \pm 0.018^a$                          | $24.96 \pm 3.72^a$     |
|            | Onslow             | $0.03 \pm 0$                       | $10.4 \pm 0.68$  | $0.5 \pm 0$     | $0.041 \pm 0.003^{bc}$                       | $13.25 \pm 0.76^{bc}$  |
|            | SHF2B1             | $0.04 \pm 0.01$                    | $8.51 \pm 1.14$  | $0.67 \pm 0.17$ | $0.047 \pm 0.008^{bc}$                       | $10.82 \pm 1.21^{bc}$  |
|            | LB composite       | $0.03 \pm 0.01$                    | $10.18 \pm 1.16$ | $0.5 \pm 0$     | $0.054 \pm 0.014^b$                          | $17.38 \pm 2.16^{ab}$  |
| Del-3-Glc  | Ira                | $0.03 \pm 0.01$                    | $5.81 \pm 0.56$  | $0.5 \pm 0.18$  | $0.039 \pm 0.012^{ab}$                       | $8.25 \pm 0.8^{ab}$    |
|            | Montgomery         | $0.03 \pm 0.01$                    | $5.52 \pm 1.16$  | $0.67 \pm 0.17$ | $0.084 \pm 0.029^a$                          | $14.84 \pm 3.55^a$     |
|            | Onslow             | $0.02 \pm 0$                       | $4.71 \pm 0.47$  | $0.5 \pm 0$     | $0.021 \pm 0.001^b$                          | $6 \pm 0.56^b$         |
|            | SHF2B1             | $0.04 \pm 0.01$                    | $7.12 \pm 0.91$  | $0.69 \pm 0.19$ | $0.022 \pm 0.001^b$                          | $4.33 \pm 0.59^b$      |
|            | LB composite       | $0.02 \pm 0$                       | $4.6 \pm 0$      | $0.5 \pm 0$     | $0.024 \pm 0.008^{ab}$                       | $4.98 \pm 0^b$         |
| Mal-3-Glc  | Ira                | $0.033 \pm 0.01$                   | $7.99 \pm 1.03$  | $0.56 \pm 0.16$ | $0.027 \pm 0.006^b$                          | $6.42 \pm 0.81^b$      |
|            | Montgomery         | $0.04 \pm 0.01$                    | $10.8 \pm 2.29$  | $1 \pm 0.35$    | $0.076 \pm 0.009^a$                          | $14.65 \pm 3.16^a$     |
|            | Onslow             | $0.03 \pm 0.01$                    | $10.07 \pm 0.56$ | $0.5 \pm 0$     | $0.028 \pm 0.004^b$                          | $8.83 \pm 0.4^{ab}$    |
|            | SHF2B1             | $0.04 \pm 0.01$                    | $10.05 \pm 2.05$ | $0.56 \pm 0.16$ | $0.022 \pm 0.003^b$                          | $5.53 \pm 1.04^b$      |
|            | LB composite       | $0.04 \pm 0.01$                    | $11.51 \pm 2.23$ | $0.5 \pm 0$     | $0.026 \pm 0.006^b$                          | $6.71 \pm 1.38^b$      |
| Peo-3-Glc  | Ira                | $0.03 \pm 0.01$                    | $6.36 \pm 0.98$  | $0.44 \pm 0.06$ | $0.035 \pm 0.014$                            | $8.14 \pm 1.25^c$      |
|            | Montgomery         | $0.03 \pm 0.01$                    | $7.87 \pm 0.96$  | $0.56 \pm 0.16$ | $0.106 \pm 0.037$                            | $28.99 \pm 3.94^a$     |
|            | Onslow             | $0.02 \pm 0$                       | $8.18 \pm 0.46$  | $30 \pm 0$      | $0.028 \pm 0.006$                            | $10.93 \pm 0.49^{bc}$  |
|            | SHF2B1             | $0.04 \pm 0.01$                    | $8.75 \pm 1.45$  | $0.69 \pm 0.19$ | $0.088 \pm 0.024$                            | $19.11 \pm 2.81^{abc}$ |
|            | LB composite       | $0.02 \pm 0.01$                    | $11.25 \pm 1.46$ | $0.38 \pm 0.13$ | $0.055 \pm 0.007$                            | $20.39 \pm 2.91^{ab}$  |
| Pet-3-Glc  | Ira                | $0.03 \pm 0.01$                    | $6.44 \pm 0.79$  | $0.44 \pm 0.06$ | $0.042 \pm 0.014$                            | $10.34 \pm 1.26^{ab}$  |
|            | Montgomery         | $0.03 \pm 0.01$                    | $7.2 \pm 1.81$   | $0.56 \pm 0.16$ | $0.093 \pm 0.042$                            | $25.98 \pm 6.71^a$     |
|            | Onslow             | $0.03 \pm 0$                       | $8.37 \pm 0.53$  | $0.5 \pm 0$     | $0.044 \pm 0.006$                            | $13.08 \pm 0.71^{ab}$  |
|            | SHF2B1             | $0.04 \pm 0.01$                    | $8.26 \pm 1.32$  | $0.69 \pm 0.19$ | $0.029 \pm 0.007$                            | $6.6 \pm 0.93^b$       |
|            | LB composite       | $0.03 \pm 0.01$                    | $8.89 \pm 1.74$  | $0.88 \pm 0.38$ | $0.038 \pm 0.009$                            | $12.42 \pm 2.58^{ab}$  |

407 Data represented as mean  $\pm$  SEM (n=4 rats / group). Different letters represent significant  
408 differences between blueberry genotypes, within each metabolite ( $p < 0.05$ ). Data represented as  
409 mean  $\pm$  SEM (n = 3-4 rats / group). Cy-3-Glcs, cyanidin-3-glucosides; Del-3-Glcs, delphinidin-  
410 3-glucosides; Mal-3-Glcs, malvidin-3-glucosides; Peo-3-Glcs, peonidin-3-glucosides; Pet-3-  
411 Glcs, petunidin-3-glucosides.

Supplementary Table S2. Pharmacokinetic Parameters for Flavan-3-ol Metabolites

| Metabolite | Genotype     | AUC (μmol/L*h) | Cmax (μM)                   | Tmax (h)      | AUC (μM*h/mg)      |               |  | Cmax (μM/mg) |  |  |
|------------|--------------|----------------|-----------------------------|---------------|--------------------|---------------|--|--------------|--|--|
|            |              |                |                             |               | Normalized by Dose |               |  |              |  |  |
| C-Glcr     | Ira          | 0.098 ± 0.016  | 0.040 ± 0.006 <sup>a</sup>  | 1.125 ± 0.315 | 2.386 ± 0.378      | 0.984 ± 0.154 |  |              |  |  |
|            | Montgomery   | 0.089 ± 0.013  | 0.034 ± 0.005 <sup>ab</sup> | 1.375 ± 0.375 | 2.454 ± 0.401      | 0.932 ± 0.145 |  |              |  |  |
|            | Onslow       | 0.099 ± 0.025  | 0.037 ± 0.007 <sup>ab</sup> | 1.250 ± 0.250 | 2.519 ± 0.619      | 0.955 ± 0.163 |  |              |  |  |
|            | SHF2B1-21:3  | 0.051 ± 0.016  | 0.020 ± 0.004 <sup>ab</sup> | 0.500 ± 0.000 | 2.572 ± 0.775      | 1.036 ± 0.199 |  |              |  |  |
|            | LB composite | 0.037 ± 0.016  | 0.015 ± 0.005 <sup>b</sup>  | 1.875 ± 0.774 | 2.456 ± 1.054      | 1.031 ± 0.362 |  |              |  |  |
| MeC-Glcr   | Ira          | 0.154 ± 0.016  | 0.039 ± 0.005               | 1.125 ± 0.315 | 3.764 ± 0.380      | 0.962 ± 0.120 |  |              |  |  |
|            | Montgomery   | 0.134 ± 0.017  | 0.042 ± 0.007               | 1.500 ± 0.289 | 3.658 ± 0.515      | 1.078 ± 0.157 |  |              |  |  |
|            | Onslow       | 0.136 ± 0.036  | 0.039 ± 0.008               | 1.125 ± 0.315 | 3.442 ± 0.880      | 1.076 ± 0.172 |  |              |  |  |
|            | SHF2B1-21:3  | 0.096 ± 0.030  | 0.024 ± 0.005               | 0.750 ± 0.144 | 4.814 ± 1.425      | 2.000 ± 0.365 |  |              |  |  |
|            | LB composite | 0.089 ± 0.033  | 0.021 ± 0.007               | 1.875 ± 0.774 | 5.874 ± 2.213      | 1.623 ± 0.359 |  |              |  |  |
| EC-Glcr    | Ira          | 0.027 ± 0.005  | 0.013 ± 0.002               | 1.000 ± 0.354 | 9.896 ± 1.734      | 4.631 ± 0.880 |  |              |  |  |
|            | Montgomery   | 0.044 ± 0.005  | 0.018 ± 0.003               | 1.375 ± 0.375 | 9.448 ± 1.268      | 3.799 ± 0.701 |  |              |  |  |
|            | Onslow       | 0.065 ± 0.017  | 0.024 ± 0.004               | 1.500 ± 0.289 | 7.793 ± 2.010      | 2.855 ± 0.429 |  |              |  |  |
|            | SHF2B1-21:3  | 0.048 ± 0.018  | 0.017 ± 0.004               | 0.750 ± 0.144 | 8.942 ± 3.085      | 3.079 ± 0.743 |  |              |  |  |
|            | LB composite | 0.033 ± 0.011  | 0.014 ± 0.003               | 1.375 ± 0.875 | 10.358 ± 3.559     | 4.533 ± 1.634 |  |              |  |  |
| MeEC-Glcr  | Ira          | 0.045 ± 0.011  | 0.013 ± 0.002               | 0.750 ± 0.144 | 0.016 ± 0.004      | 0.007 ± 0.003 |  |              |  |  |
|            | Montgomery   | 0.054 ± 0.014  | 0.018 ± 0.003               | 1.250 ± 0.250 | 0.011 ± 0.003      | 0.003 ± 0.001 |  |              |  |  |
|            | Onslow       | 0.071 ± 0.023  | 0.024 ± 0.004               | 1.250 ± 0.250 | 0.008 ± 0.003      | 0.002 ± 0.001 |  |              |  |  |

|  |              |       |   |       |       |   |       |       |   |       |       |   |       |       |   |       |
|--|--------------|-------|---|-------|-------|---|-------|-------|---|-------|-------|---|-------|-------|---|-------|
|  | SHF2B1-21:3  | 0.061 | ± | 0.022 | 0.017 | ± | 0.004 | 1.125 | ± | 0.315 | 0.011 | ± | 0.004 | 0.004 | ± | 0.001 |
|  | LB composite | 0.051 | ± | 0.020 | 0.014 | ± | 0.003 | 1.500 | ± | 0.289 | 0.016 | ± | 0.006 | 0.005 | ± | 0.001 |

Data represented as mean ± SEM (n=4 rats / group). Letters represent significant differences ( $p < 0.05$ ) in metabolites between genotypes. EC-glcr, epicatechin-5-glucuronide; C-glcr, catechin-5-glucuronide; EC-gclr, 3'-O-methylepicatechin-5-glcr; MeC-glcr, 3'-O-methylcatechin-5-glcr.

Supplementary Table S3. Pharmacokinetic parameters for flavan-3-ol metabolites

| Metabolite | Genotype     | AUC ( $\mu\text{mol/L}\cdot\text{h}$ ) | Cmax ( $\mu\text{M}$ )         | Tmax (h)                        | AUC ( $\mu\text{M}\cdot\text{h}/\text{mg}$ ) | Cmax ( $\mu\text{M}/\text{mg}$ ) |
|------------|--------------|----------------------------------------|--------------------------------|---------------------------------|----------------------------------------------|----------------------------------|
|            |              |                                        |                                |                                 | Normalized by Dose                           |                                  |
| Q-Gclr     | Ira          | 0.200 $\pm$ 0.029                      | 0.096 $\pm$ 0.015              | 0.500 $\pm$ 0.000               | 0.718 $\pm$ 0.098 <sup>ab</sup>              | 0.046 $\pm$ 0.018 <sup>d</sup>   |
|            | Montgomery   | 0.312 $\pm$ 0.082                      | 0.173 $\pm$ 0.038              | 0.625 $\pm$ 0.125               | 1.191 $\pm$ 0.342 <sup>a</sup>               | 0.658 $\pm$ 0.160 <sup>a</sup>   |
|            | Onslow       | 0.258 $\pm$ 0.027                      | 0.135 $\pm$ 0.022              | 0.500 $\pm$ 0.000               | 0.763 $\pm$ 0.071 <sup>ab</sup>              | 0.402 $\pm$ 0.066 <sup>ab</sup>  |
|            | SHF2B1-21:3  | 0.193 $\pm$ 0.026                      | 0.116 $\pm$ 0.013              | 0.500 $\pm$ 0.000               | 0.355 $\pm$ 0.050 <sup>b</sup>               | 0.215 $\pm$ 0.026 <sup>bc</sup>  |
|            | LB composite | 0.334 $\pm$ 0.040                      | 0.111 $\pm$ 0.038              | 1.000 $\pm$ 0.354               | 0.424 $\pm$ 0.051 <sup>b</sup>               | 0.141 $\pm$ 0.023 <sup>c</sup>   |
| MeQ-Gclr   | Ira          | 0.026 $\pm$ 0.026                      | 0.005 $\pm$ 0.005              | 2.000 $\pm$ 0.000               | 0.093 $\pm$ 0.093 <sup>c</sup>               | 0.004 $\pm$ 0.004 <sup>c</sup>   |
|            | Montgomery   | 0.185 $\pm$ 0.053                      | 0.074 $\pm$ 0.017              | 1.250 $\pm$ 0.433               | 0.705 $\pm$ 0.218 <sup>a</sup>               | 0.281 $\pm$ 0.070 <sup>a</sup>   |
|            | Onslow       | 0.146 $\pm$ 0.035                      | 0.059 $\pm$ 0.007              | 0.875 $\pm$ 0.375               | 0.432 $\pm$ 0.100 <sup>ab</sup>              | 0.174 $\pm$ 0.021 <sup>ab</sup>  |
|            | SHF2B1-21:3  | 0.132 $\pm$ 0.034                      | 0.049 $\pm$ 0.008              | 0.500 $\pm$ 0.000               | 0.242 $\pm$ 0.060 <sup>ab</sup>              | 0.090 $\pm$ 0.015 <sup>b</sup>   |
|            | LB composite | 0.242 $\pm$ 0.054                      | 0.056 $\pm$ 0.008              | 1.875 $\pm$ 0.774               | 0.309 $\pm$ 0.073 <sup>ab</sup>              | 0.071 $\pm$ 0.011 <sup>b</sup>   |
| Myr-Gclr   | Ira          | 1.779 $\pm$ 0.201 <sup>a</sup>         | 0.492 $\pm$ 0.024 <sup>a</sup> | 0.875 $\pm$ 0.375 <sup>c</sup>  | 0.315 $\pm$ 0.038 <sup>a</sup>               | 0.087 $\pm$ 0.005 <sup>a</sup>   |
|            | Montgomery   | 2.345 $\pm$ 0.344 <sup>a</sup>         | 0.768 $\pm$ 0.132 <sup>a</sup> | 2.000 $\pm$ 0.000 <sup>ab</sup> | 0.168 $\pm$ 0.028 <sup>b</sup>               | 0.055 $\pm$ 0.011 <sup>b</sup>   |
|            | Onslow       | 0.696 $\pm$ 0.028 <sup>b</sup>         | 0.226 $\pm$ 0.010 <sup>b</sup> | 1.250 $\pm$ 0.250 <sup>bc</sup> | 0.115 $\pm$ 0.005 <sup>b</sup>               | 0.037 $\pm$ 0.002 <sup>b</sup>   |
|            | SHF2B1-21:3  | 0.219 $\pm$ 0.022 <sup>c</sup>         | 0.068 $\pm$ 0.004 <sup>c</sup> | 0.875 $\pm$ 0.125 <sup>c</sup>  | 0.001 $\pm$ 0.000 <sup>c</sup>               | 0.000 $\pm$ 0.000 <sup>c</sup>   |
|            | LB composite | 0.746 $\pm$ 0.111 <sup>b</sup>         | 0.195 $\pm$ 0.020 <sup>b</sup> | 3.250 $\pm$ 0.750 <sup>a</sup>  | 0.014 $\pm$ 0.002 <sup>c</sup>               | 0.004 $\pm$ 0.000 <sup>c</sup>   |

Letters represent significant differences ( $p < 0.05$ ) in pharmacokinetic parameters between blueberry genotypes for each metabolite. Q-Gclr, quercetin-3-glucuronide; MeQ-Gclr, methylquercetin-3-glucuronide; Myr-Gclr, myricetin glucuronide. Data represented as mean  $\pm$  SEM (n=4 rats / group).

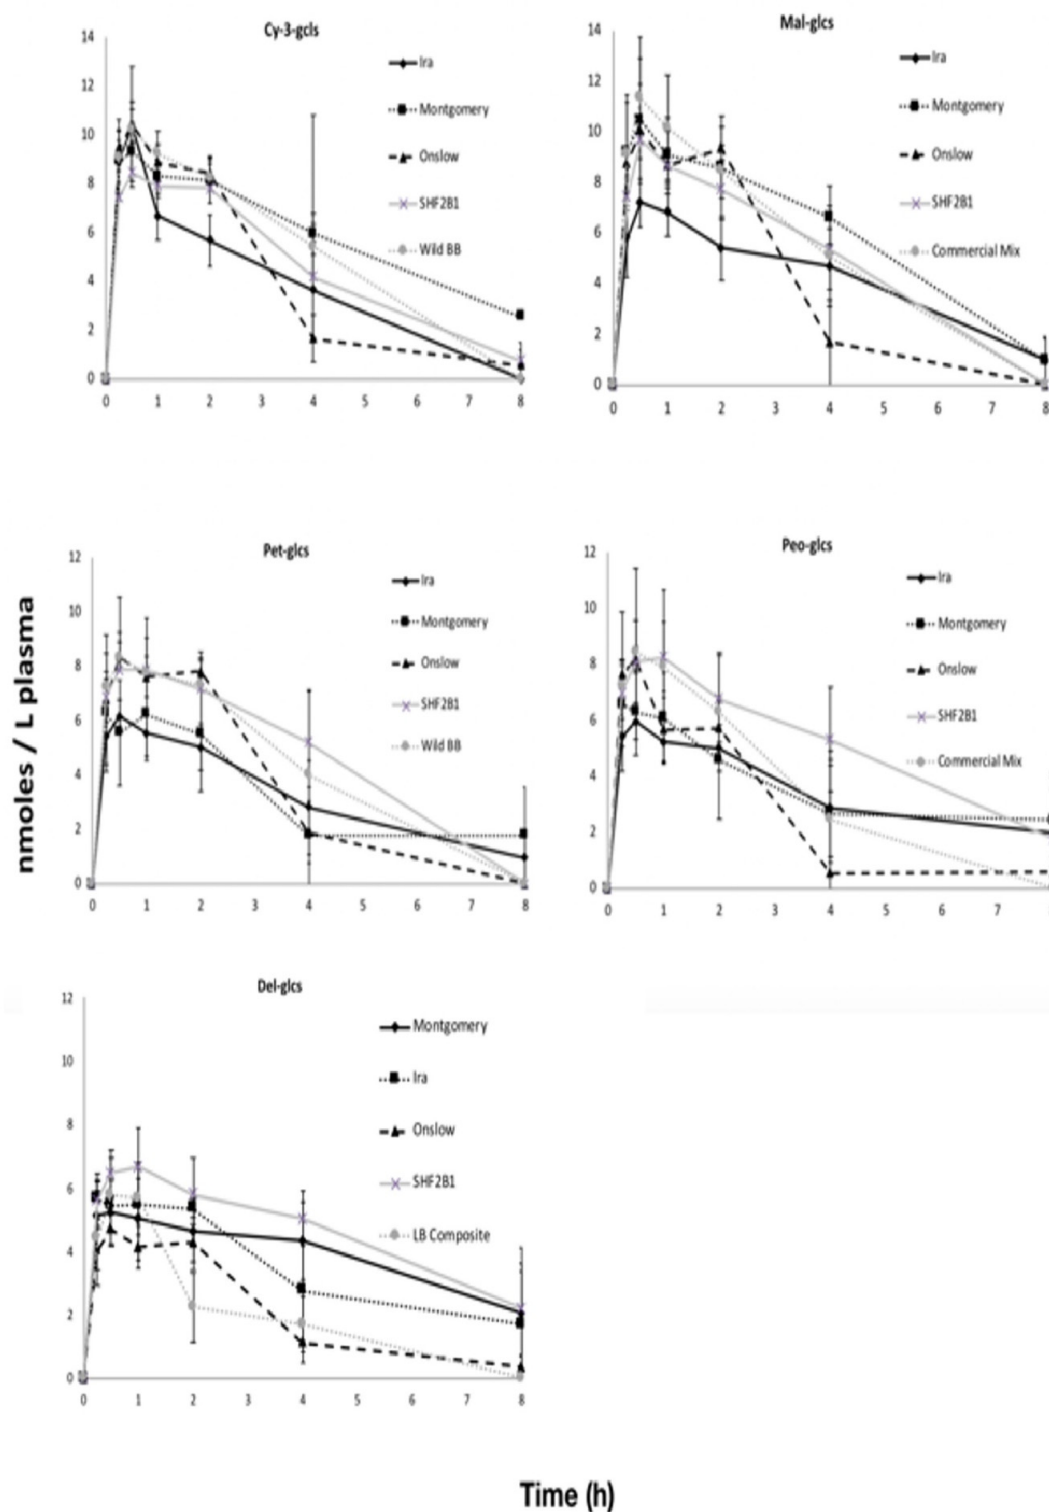

Supplementary Figure S1. Plasma pharmacokinetic response of anthocyanin metabolites from different blueberry genotypes. Data represented as mean  $\pm$  SEM (n=4 rats / group).

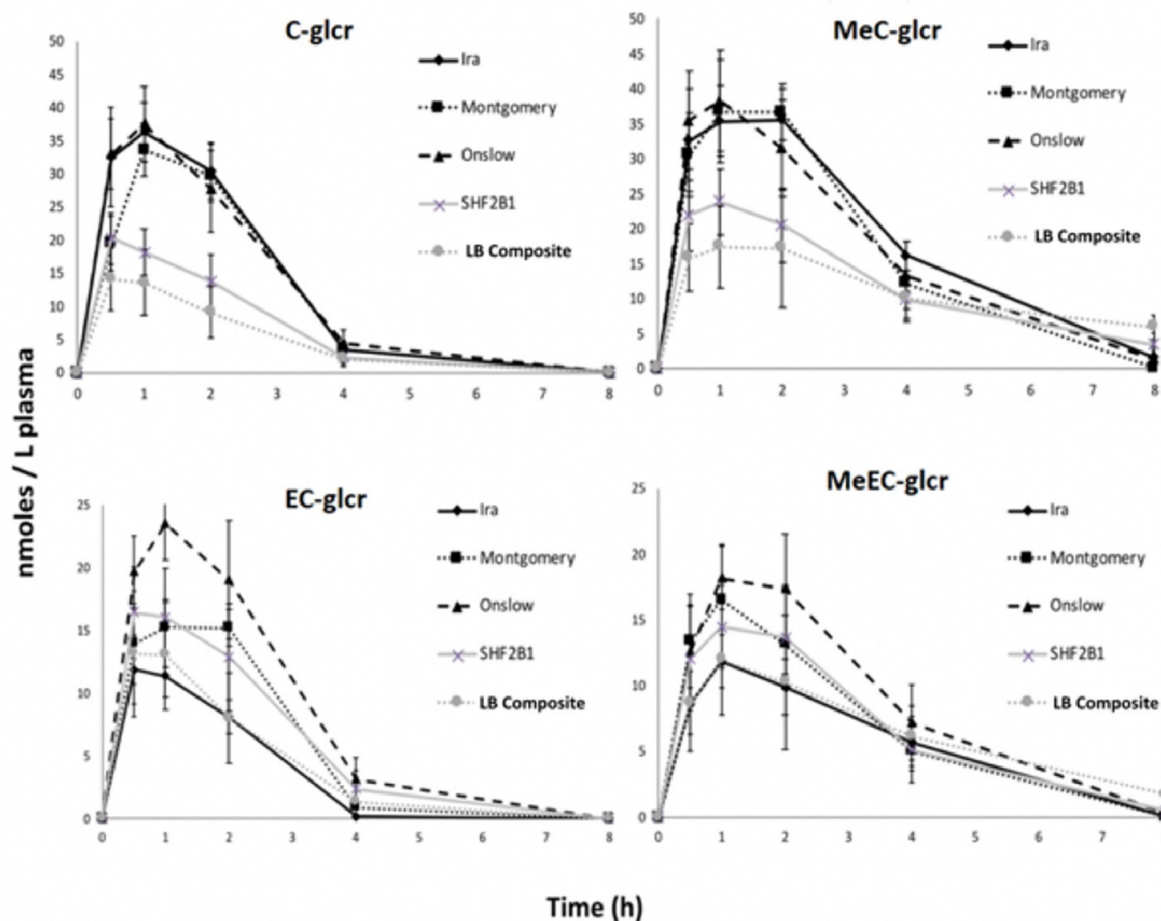

Supplementary Figure S2. Plasma pharmacokinetic response of flavan-3-ols metabolites from different blueberry genotypes. Data represented as mean  $\pm$  SEM (n = 4 rats / group). EC-glcr, epicatechin-5-glucuronide; C-glcr, catechin-5-glucuronide; EC-glcr, 3'-O-methylepicatechin-5-glcr; MeC-glcr, 3'-O-methylcatechin-5-glcr.

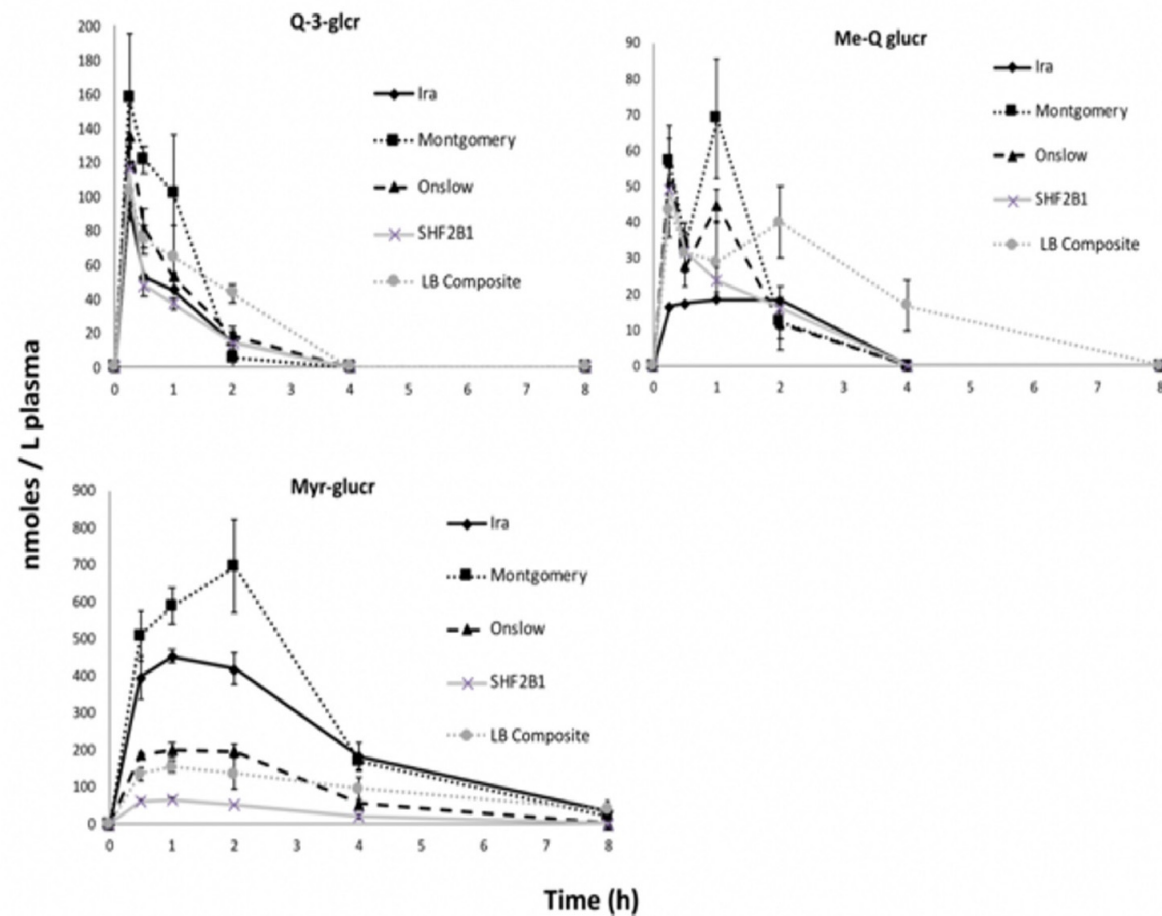

Supplementary Figure S3. Plasma pharmacokinetic response of flavonol metabolites from different blueberry genotypes. Data represented as mean  $\pm$  SEM ( $n = 4$  rats / group). Q-3-glcr, quercetin-3-glucuronide; Me-Q-glucr, methylquercetin-3-glucuronide; Myr-glucr, myricetin glucuronide.



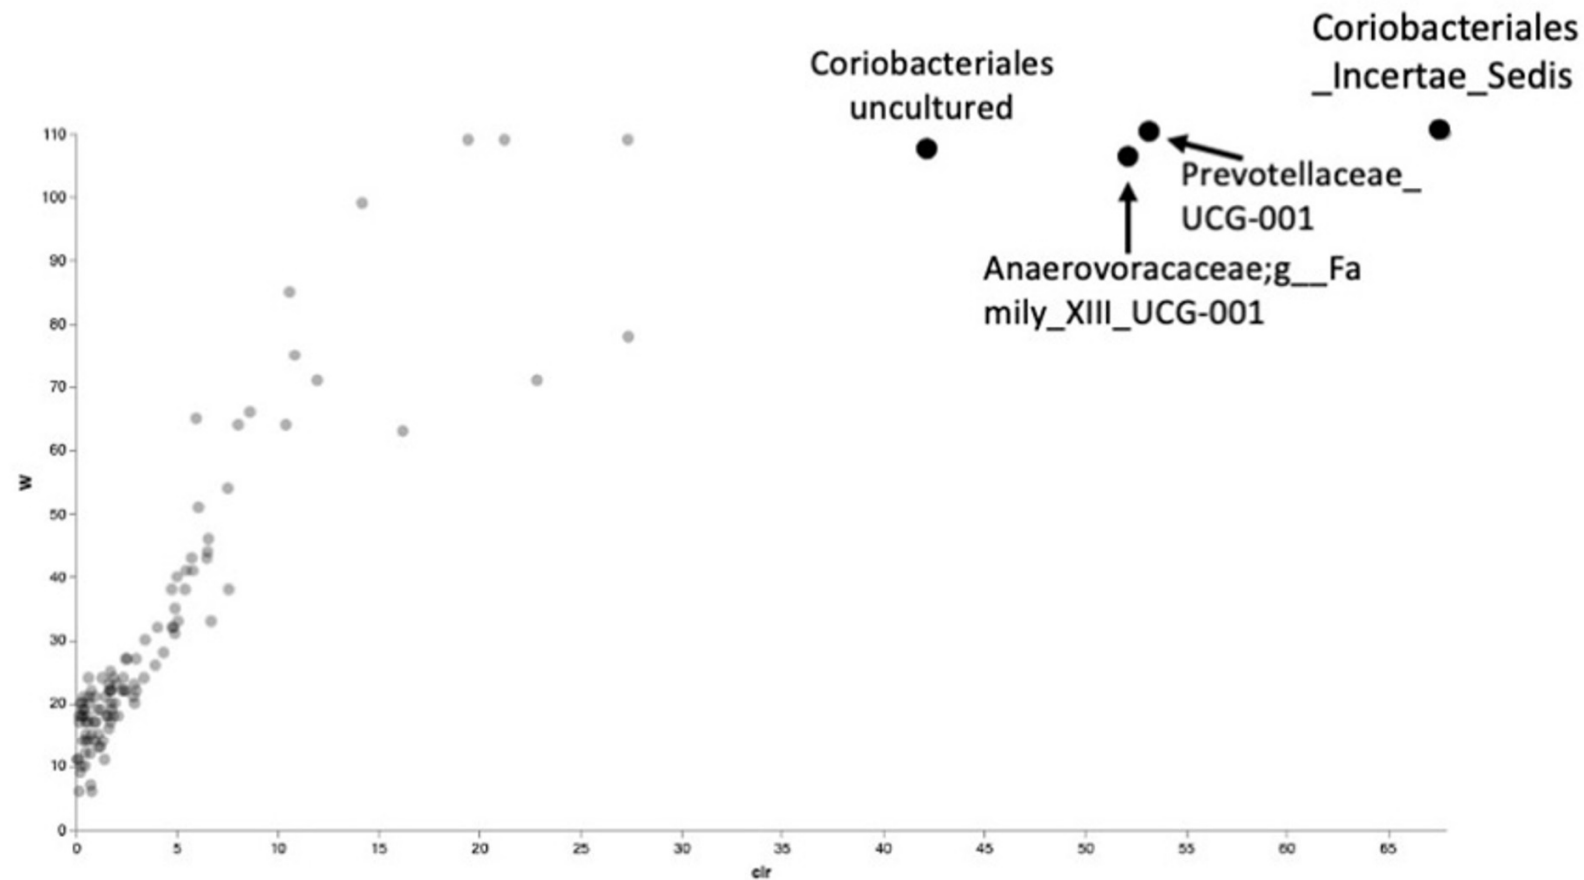

Figure S4. Volcano plots of taxa identified by Analysis of Composition of Microbiomes (ANCOM) as differentially abundant in different doses of blueberry diet. Taxa in the upper right side ( $\text{clr} > 40$  and  $W > 100$ ) of the figure are illustrated using box-plots in Figure 7. X-axis represented by center log ratio (clr) and y-axis is W is number of time null hypothesis was rejected.
